# Supplementary material for: Nitrogen modified titanium dioxide (N-TiO2) promotes carbon monoxide oxidation over copper catalysts
Source: Royal Society of Chemistry journal article supplement (doi:10.1039/d0nj03353g), 2020-01-01
Supplement: d0nj03353g1.pdf [file d0nj03353g1.pdf]

## Supplementary Information

### **Nitrogen Modified Titanium Dioxide (N-TiO<sub>2</sub>) Promotes Carbon Monoxide Oxidation over Copper Catalysts**

Guoqiang Cao, Nan Yi \*

Department of Chemical Engineering, University of New Hampshire, Durham,

New Hampshire, 03824, United States

\*corresponding author: [nan.yi@unh.edu](mailto:nan.yi@unh.edu)

## 1. Catalysts Preparation

*Nitrogen modified TiO<sub>2</sub> (N-TiO<sub>2</sub>)* Typically titanium dioxide (P25, Sigma-Aldrich) and urea (Sigma-Aldrich) were physically mixed with mass ratio of TiO<sub>2</sub> and urea as 1:5. The mixture was placed in vacuum oven under room temperature overnight. The dried mixtures were calcined at 550 °C for 15 hours. Calcined samples were symbolized as *N-TiO<sub>2</sub>*.

*Cu-N-TiO<sub>2</sub>* Copper (II) acetate (Sigma-Aldrich) and N-TiO<sub>2</sub> supports were mixed with D.I. water and stirred for 5 minutes. 10 mL sodium hydroxide solution (1M) was added dropwise to the mixture. After 1 hour stirring at room temperature, the precipitate was separated through centrifuge, followed by D. I. water washing until the pH value of the washing solution reaches 7. The as-prepared samples were dried at 50 °C under vacuum. The copper weight was designed as 10 weight%. Dried samples were symbolized as *Cu-N-TiO<sub>2</sub>*.

*Cu-TiO<sub>2</sub>* The same procedure as Cu-N-TiO<sub>2</sub> was applied to synthesize Cu-TiO<sub>2</sub>. TiO<sub>2</sub> (P25, Sigma-Aldrich) were calcined at 550 °C for 15 hours before introducing copper.

## 2. Characterization

### BET Surface Area

The Brunauer-Emmet-Teller (BET) test was performed on Micromeritics AutoChem II 2920 equipped with a thermal conductivity detector. Prior to the test, samples were pre-treated with pure helium at 200 °C for 1.5 h. Isotherms of N<sub>2</sub> adsorption-desorption were measured based on acquisition of N<sub>2</sub> adsorption isotherm at 77K.

### Raman Spectroscopy

Raman spectra was collected with a NT-MDT Raman spectrometer using diode laser beam. An excitation wavelength of 532 nm was used. Spectrum were collected by co-adding five scans of 10 s and the laser power of  $22 \pm 2$  mW under ambient conditions.

### In-Situ Diffuse Reflectance Fourier Transform Infrared Spectroscopy (In-Situ DRIFTS)

In-situ diffuse reflectance Fourier transform infrared spectroscopy (in-situ DRIFTS) experiments were performed using a Thermo Scientific Nicolet iS50 FT-IR spectrometer equipped with a MCT detector and a KBr beam splitter. Samples were first pretreated with pure helium at 200 °C for 1.5 hrs. A gas mixture (1%CO, 20%O<sub>2</sub> balanced in Helium) was introduced. The tested were conducted at 80 °C, 100 °C, 120 °C,

140 °C, 160 °C and 180 °C. All the background scans of the samples were collected under helium prior to the reaction.

### Surface Copper Dispersion

Copper dispersion and the specific surface area of metallic copper of catalyst was measured by dissociative N<sub>2</sub>O oxidation and H<sub>2</sub> titration. Typically, 25 mg catalysts were first pretreated in a helium flow at 200 °C for 1.5 h and cooled to room temperature to remove moisture and impurities that may remain on the surface. Then catalysts were reduced in a 10% H<sub>2</sub>/Ar mixture at a flow rate of 30 mL·min<sup>-1</sup> from room temperature to 200 °C. The hydrogen consumption from this reduction process was assigned as A<sub>1</sub>. Pure He (30 mL·min<sup>-1</sup>) was purged into reactor to the samples to 50 °C. The catalyst was oxidized by 10% N<sub>2</sub>O/He (30 mL·min<sup>-1</sup>) at 60 °C for 0.5 h. Subsequently, pure He (30 mL·min<sup>-1</sup>) flowed through the sample for 0.5 h to remove the residual N<sub>2</sub>O. Finally, another reduction process was performed in 10% H<sub>2</sub>/Ar (30 mL·min<sup>-1</sup>). Hydrogen consumption from the second reduction process was denoted as A<sub>2</sub>. The dispersion of Cu (D, %) was calculated as follows:

$$D = \frac{2A_2}{A_1} \times 100\%$$

The specific surface area of metallic copper (S, m<sup>2</sup>·g<sup>-1</sup>) was calculated by

$$S = 2 \times A_2 \times N_A / (A_1 \times M_{Cu} \times 1.4 \times 10^{19}) = 1353 \times \frac{A_2}{A_1}$$

where N<sub>A</sub> is Avogadro's constant, M<sub>Cu</sub> is the relative atomic mass of copper (63.46 g/mol), and 1.4 × 10<sup>19</sup> is the number of copper atom of per square meter when the average surface area of copper atom is assigned as 7.11 × 10<sup>-2</sup> nm<sup>2</sup>.

### X-ray Photoelectron Spectroscopy (XPS)

X-ray photoelectron spectroscopy (XPS) was carried out on a Thermo Scientific K-Alpha system equipped with an Al source and a 180° double focusing hemispherical analyzer with a 128- channel detector at a pass energy of 50 eV for the analyses of the core level signals of Cu 2p, N 1s, Ti 2p and O 1s. When processing the XPS spectra data, binding energy values were referenced to C 1s peak (284.8 eV) to eliminate the effect of surface adventitious contamination layer to correct the shift caused by charge effect.

### Temperature Programmed Reactions

Hydrogen-Temperature Programmed Reduction (H<sub>2</sub>-TPR) was conducted on Micromeritics AutoChem II 2920 equipped with a thermal conductivity detector. In a typical H<sub>2</sub>-TPR experiment, 50 mg of sample were pretreated with pure helium at 200 °C for 1.5 h to remove moisture and impurities on the surface. The

reduction profiles were collected from room temperature to certain temperature with the heating rate as  $5\text{ }^{\circ}\text{C}\cdot\text{min}^{-1}$  while 10%  $\text{H}_2/\text{Ar}$  mixture ( $30\text{ mL}\cdot\text{min}^{-1}$ ) flowing through samples. The hydrogen consumption calculation was based on calibrations using  $\text{Ag}_2\text{O}$  standard sample under the same test conditions.

$\text{O}_2$ -Temperature Programmed Reaction ( $\text{O}_2$ -TPR) followed the same procedure as  $\text{H}_2$ -TPR, except the carrier gas was 10% $\text{O}_2/\text{Helium}$ .

### Catalytic Activity Test

The carbon monoxide oxidation reaction was performed in a home-made fixed bed flow reactor. Typically, 50 mg of catalyst was loaded in quartz tube (O.D. = 10 mm). The reactant gas (1%  $\text{CO}$ , 20% $\text{O}_2$  balanced with  $\text{He}$ ) flows through the catalyst bed with the flow rate of  $30\text{ mL}\cdot\text{min}^{-1}$ . The samples were pre-treated with pure helium at  $200\text{ }^{\circ}\text{C}$  for 1.5 h before activity tests. The concentrations of carbon monoxide and carbon dioxide were analysed with a gas chromatograph (SRI 8160C).

**Table S1.** Analysis of Hydrogen-Temperature Programmed Reduction ( $\text{H}_2$ -TPR) Profiles

| Sample                | Peak I                  |                                                                              | Peak II                 |                                                                              | Peak III                |                                                                              | Peak IV                 |                                                                              |
|-----------------------|-------------------------|------------------------------------------------------------------------------|-------------------------|------------------------------------------------------------------------------|-------------------------|------------------------------------------------------------------------------|-------------------------|------------------------------------------------------------------------------|
|                       | T( $^{\circ}\text{C}$ ) | $\text{H}_2$<br>Consumption<br>$\mu\text{mol}\cdot\text{gcatal}^{-1}$<br>(%) |
| Cu-N-TiO <sub>2</sub> | 76                      | 186.0<br>(12.4%)                                                             | 90                      | 431.1<br>(28.8%)                                                             | 115                     | 735.4<br>(49.2)                                                              | 132                     | 142.1<br>(9.6%)                                                              |
| Cu-TiO <sub>2</sub>   |                         |                                                                              | 93                      | 270.2<br>(18.8%)                                                             | 120                     | 829.4<br>(57.8)                                                              | 136                     | 334.6<br>(23.4%)                                                             |

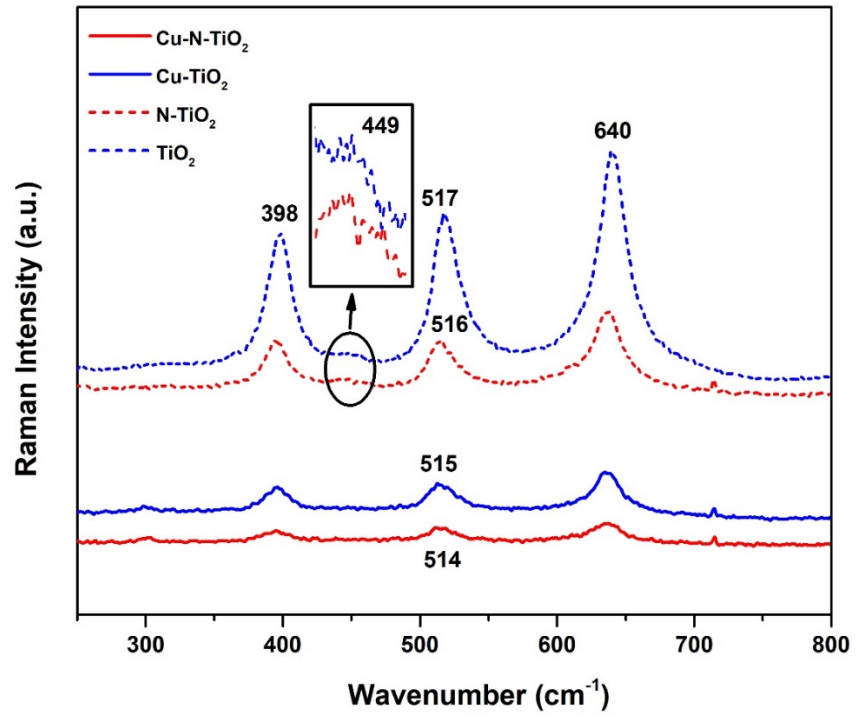

Fig. S1 Raman spectra of supports and copper modified catalysts.

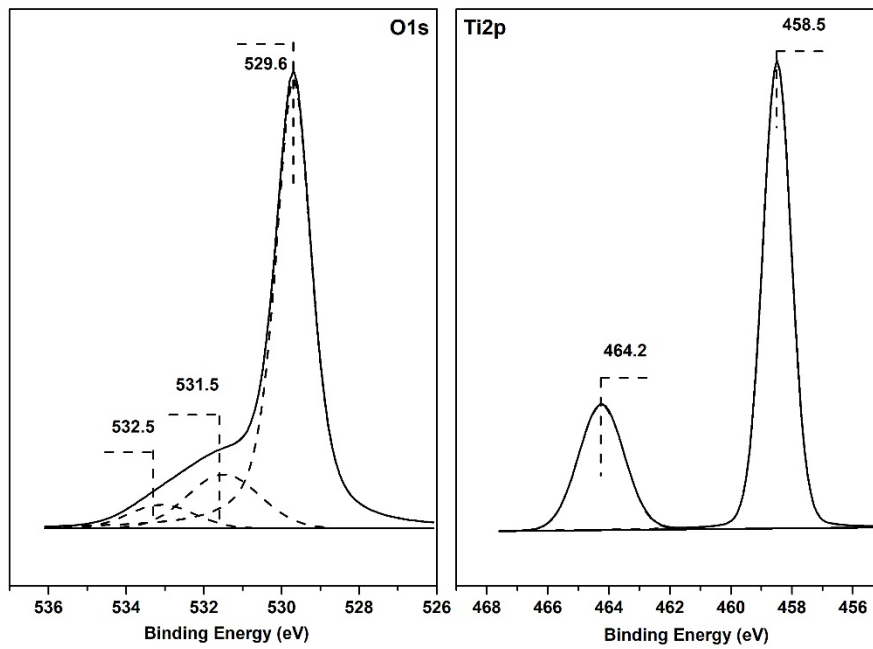

**Fig. S2** XPS spectra of *O1s* and *Ti 2p* for TiO<sub>2</sub> catalyst.

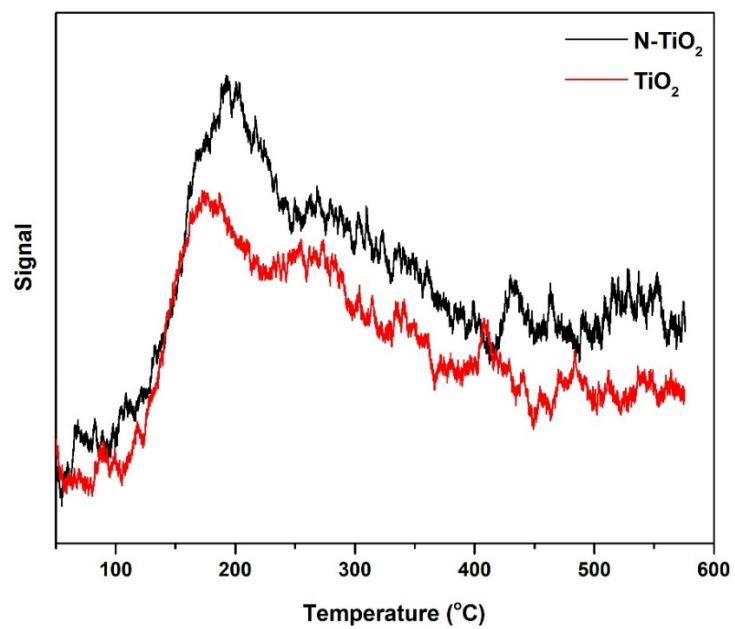

**Fig. S3** O<sub>2</sub>-Temperature Programmed Reaction (O<sub>2</sub>-TPR) profiles of N-TiO<sub>2</sub> and TiO<sub>2</sub> supports.

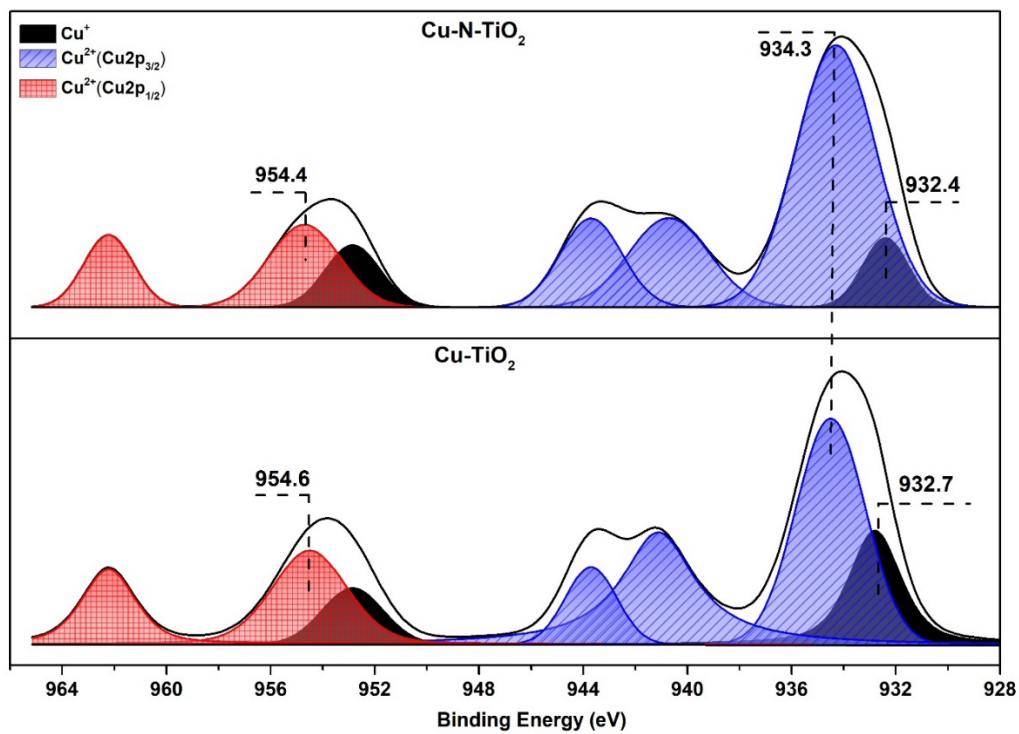

**Fig. S4** XPS spectra of *Cu 2p* for Cu-TiO<sub>2</sub> and Cu-N-TiO<sub>2</sub> catalysts.
